# Supplementary material
Source: MDPI journal article supplement (https://www.mdpi.com/2073-4344/12/10/1224)
Supplement: s1 [file s1]

## **Supporting Information**

### **Effects of Cu species on liquid-phase partial oxidation of methane with H<sub>2</sub>O<sub>2</sub> over Cu-Fe/ZSM-5 catalysts**

Min Sik Kim<sup>1</sup>, Gun Sik Yang<sup>1</sup>, and Eun Duck Park<sup>1,2,\*</sup>

*<sup>1</sup>Department of Energy Systems Research, Ajou University, 206, World cup-ro, Yeongtong-Gu,  
Suwon 16499, Republic of Korea*

*<sup>2</sup>Department of Chemical Engineering, Ajou University, 206, World cup-ro, Yeongtong-Gu,  
Suwon 16499, Republic of Korea*

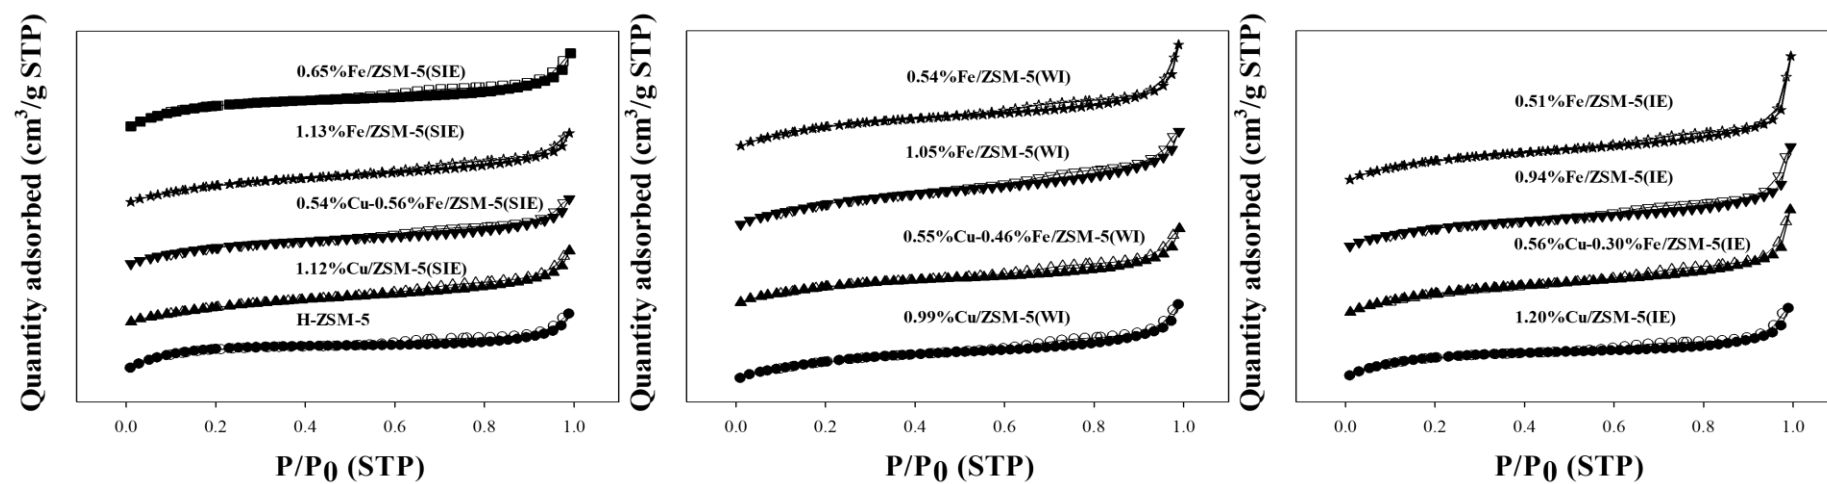

Figure S1.  $N_2$  adsorption and desorption isotherm of the prepared catalyst.

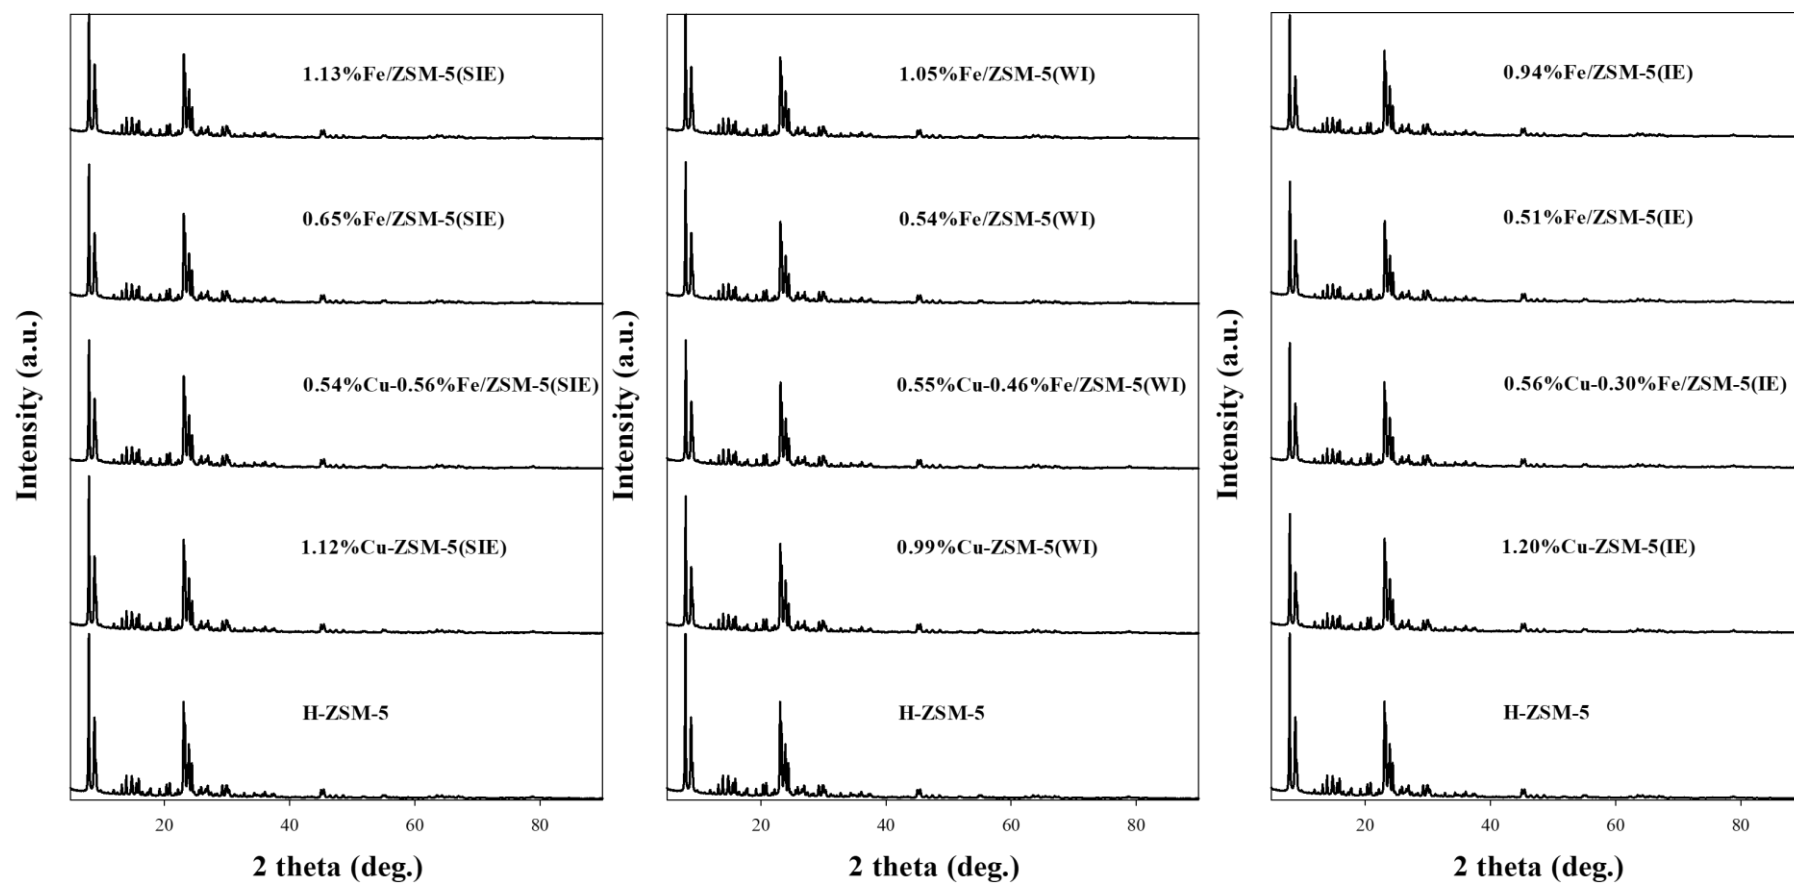

Figure S2. XRD patterns of the prepared catalysts.

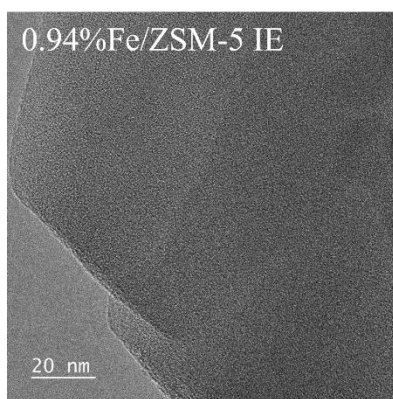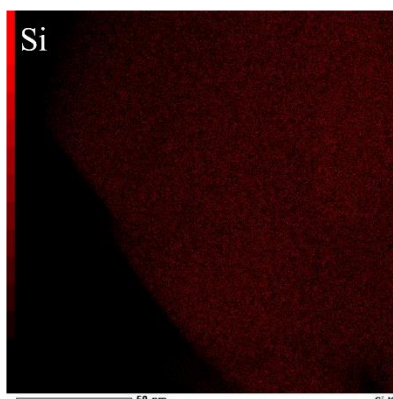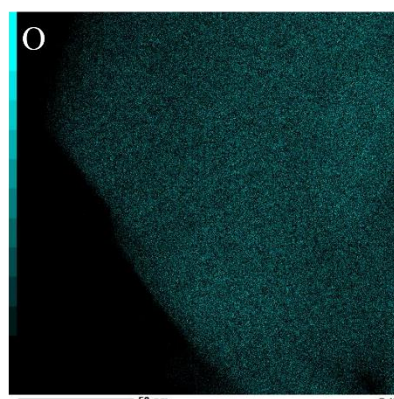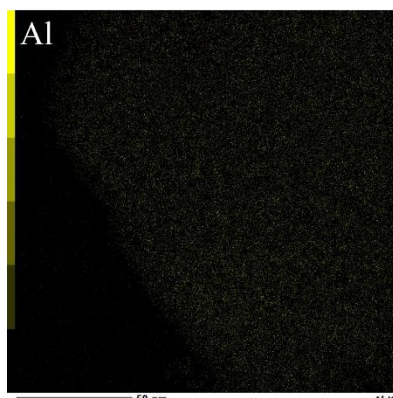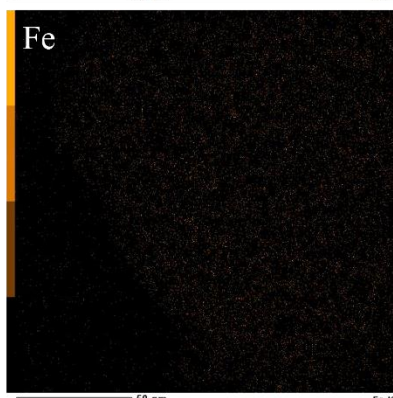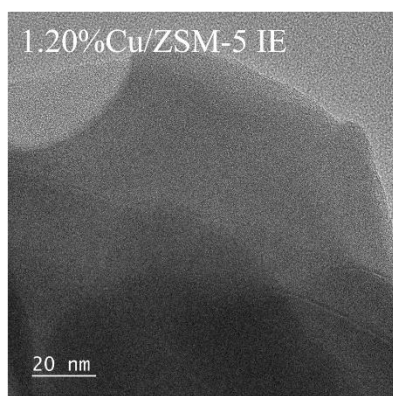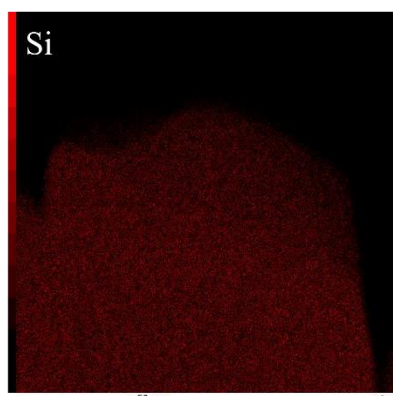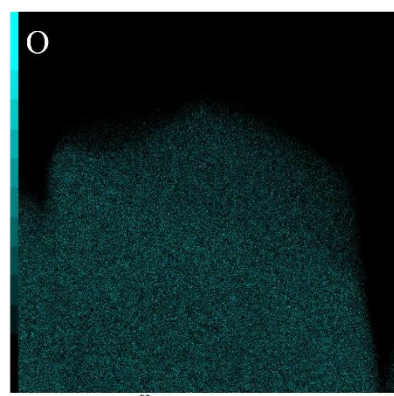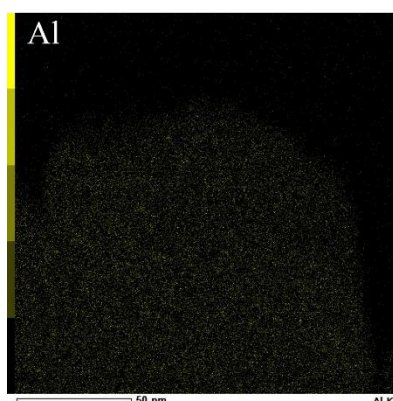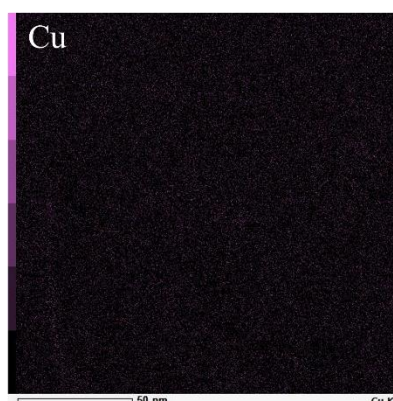



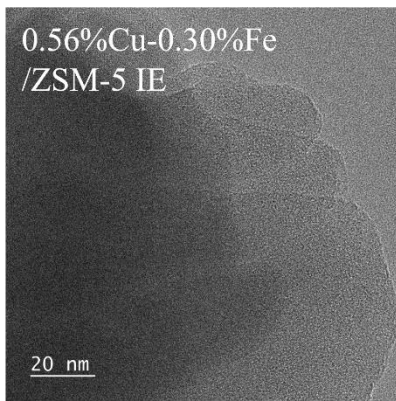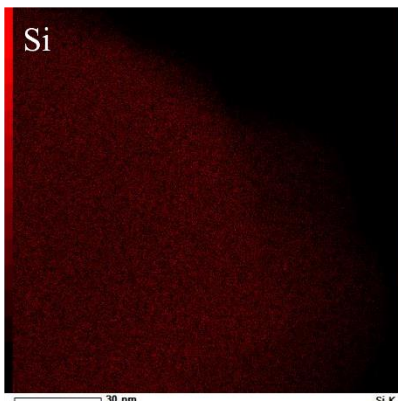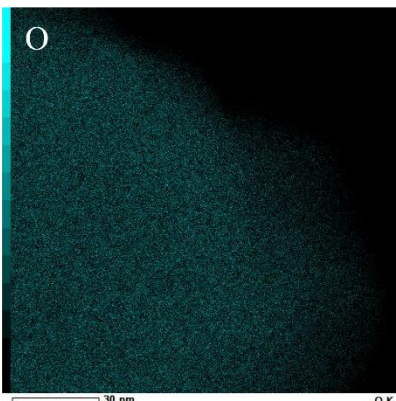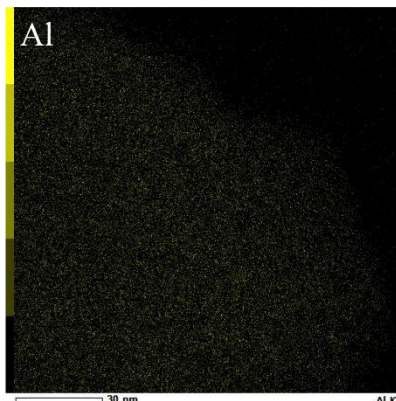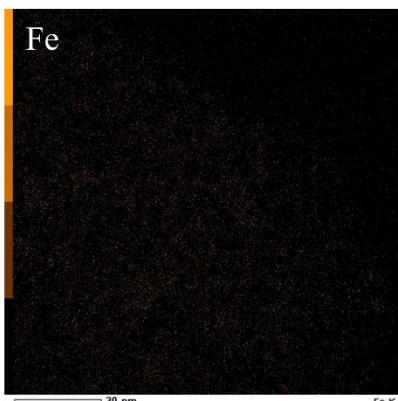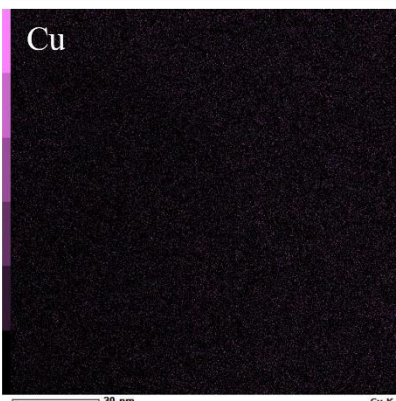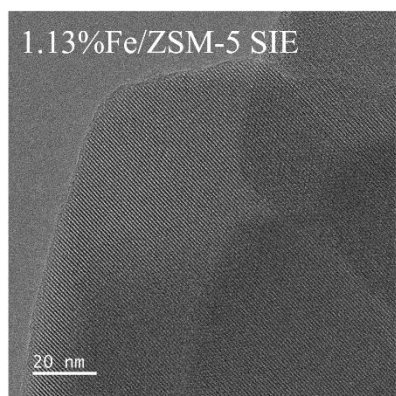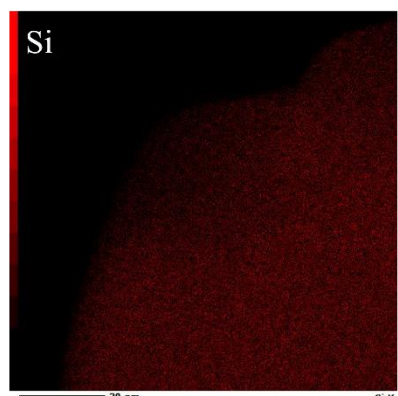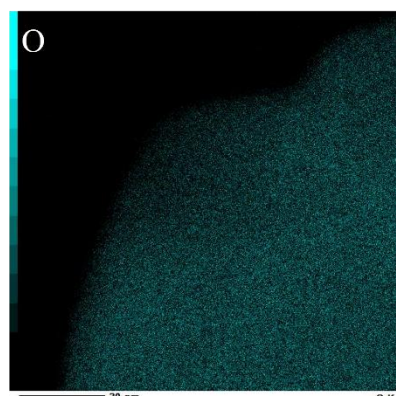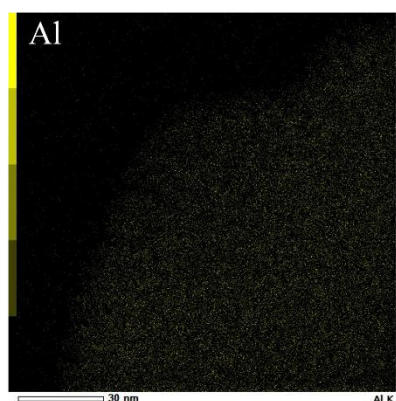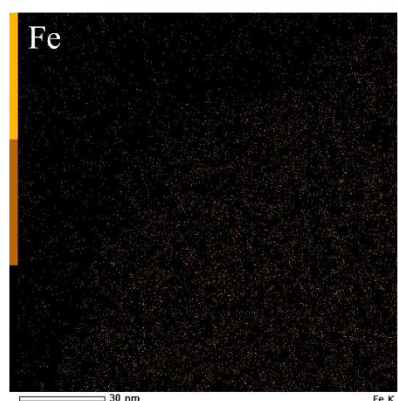



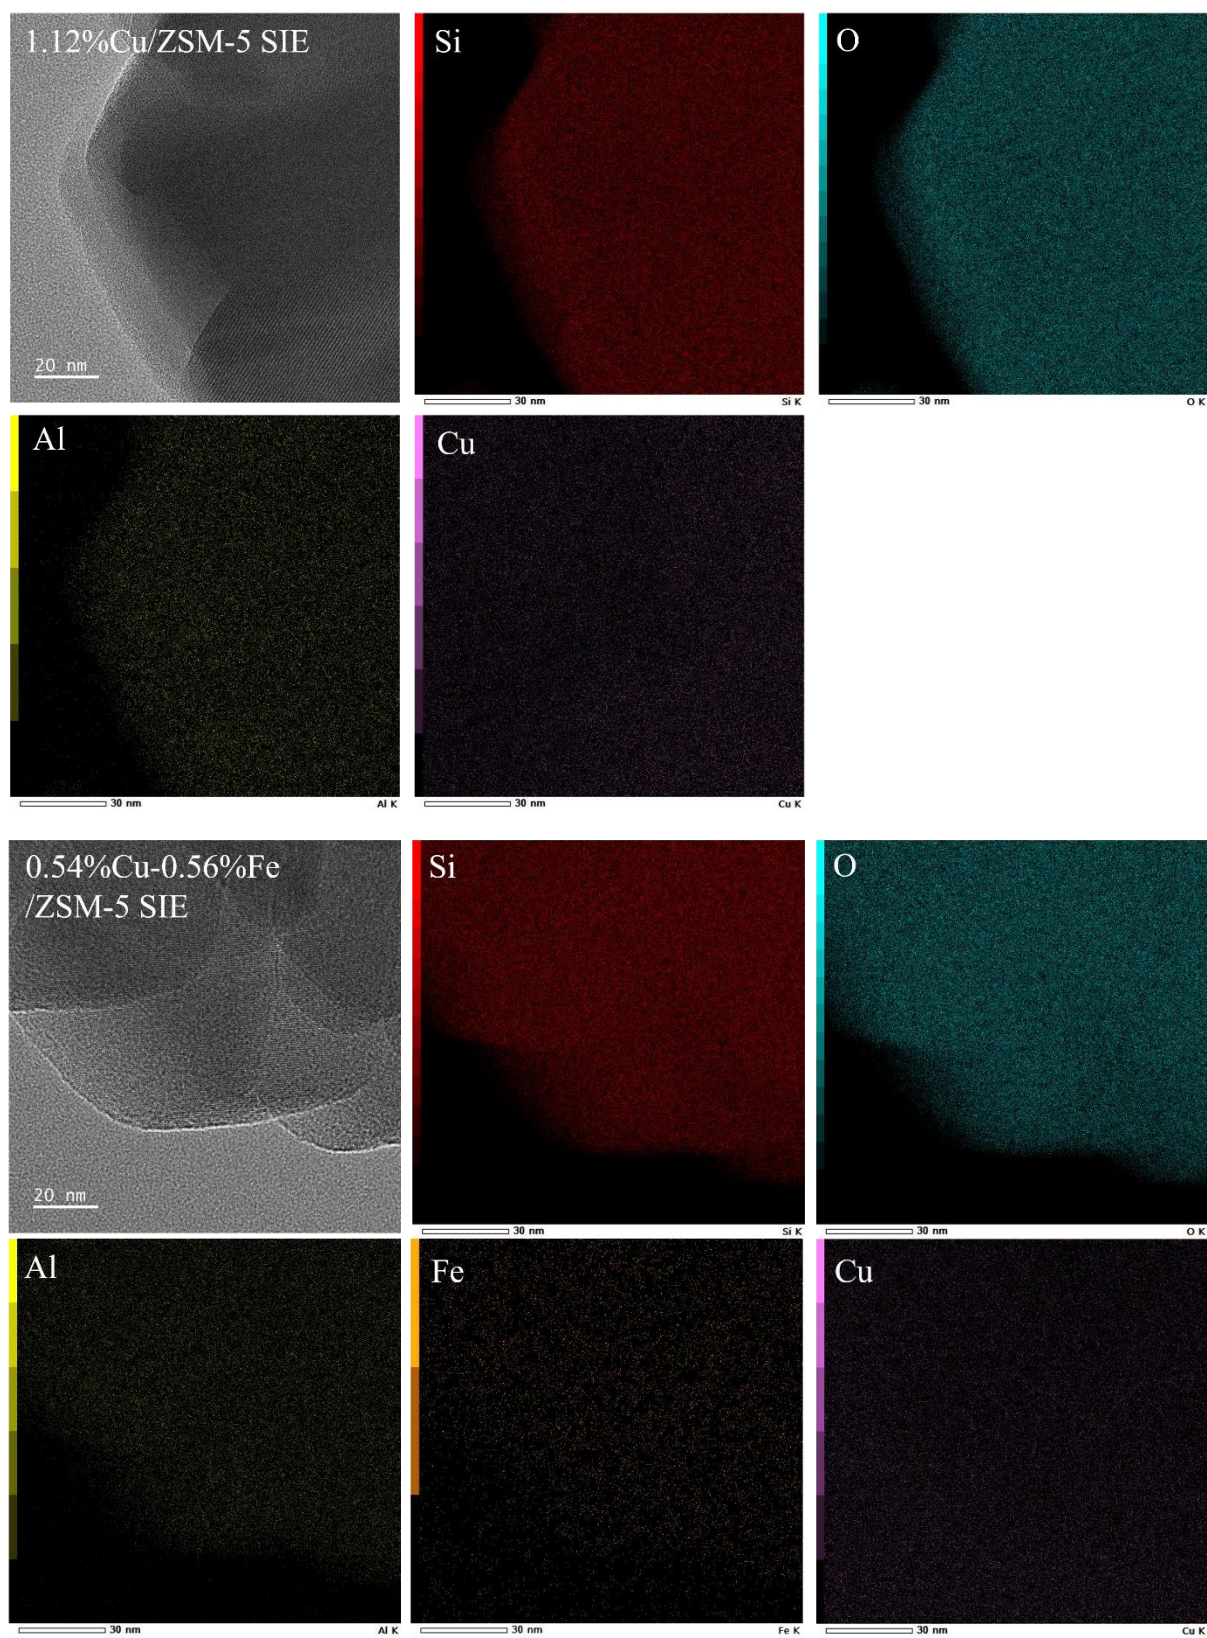

**Figure S3.** TEM images and EDS mapping results for the prepared catalysts.

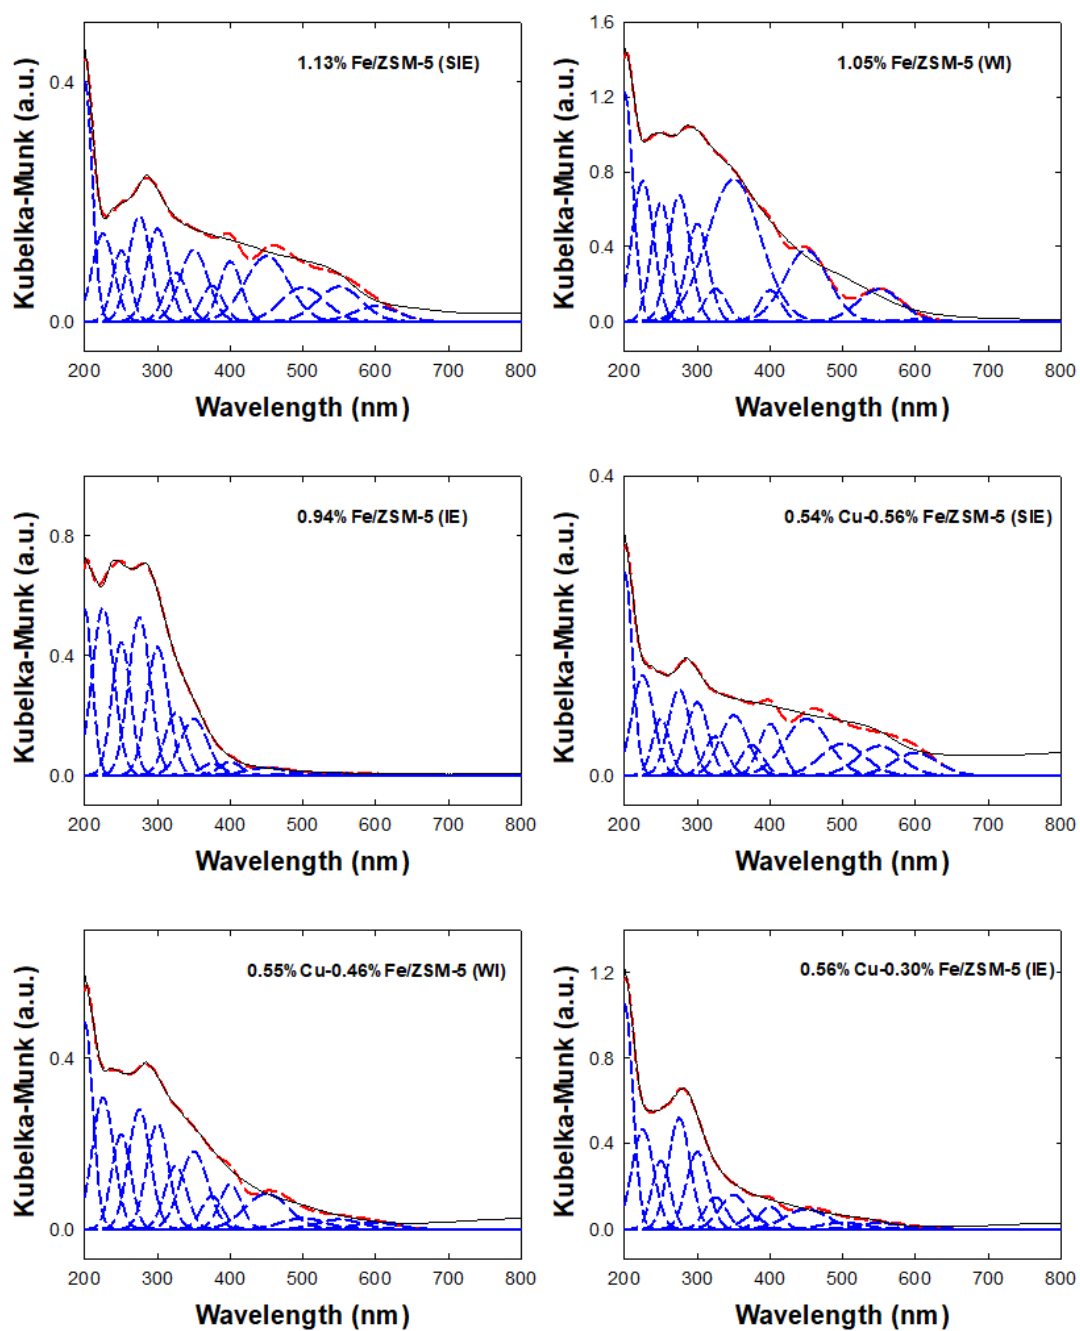

Figure S4. Deconvolution of UV-Vis spectra for the catalysts prepared with different methods.

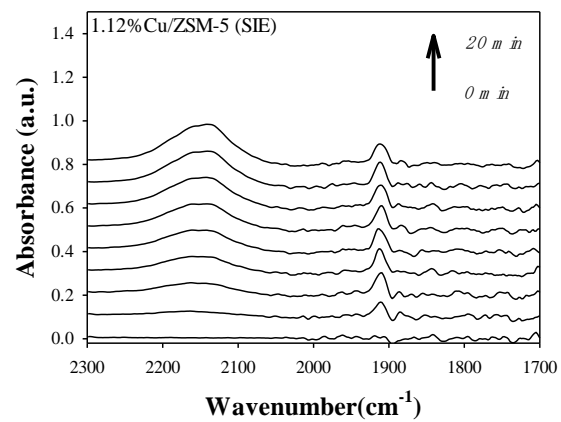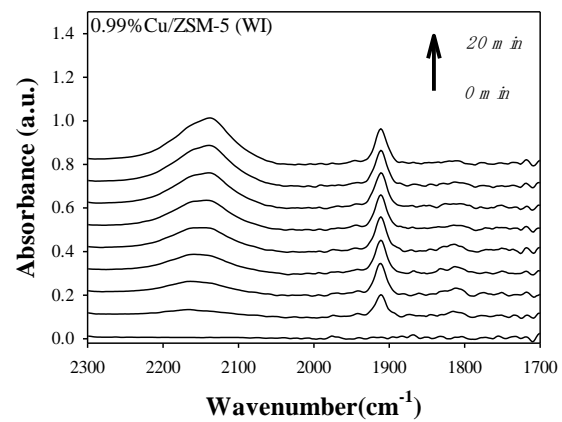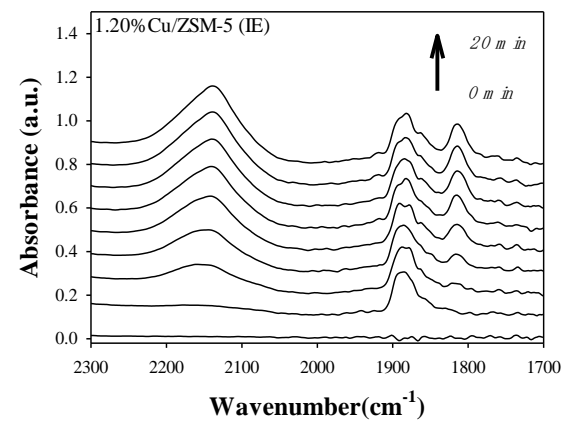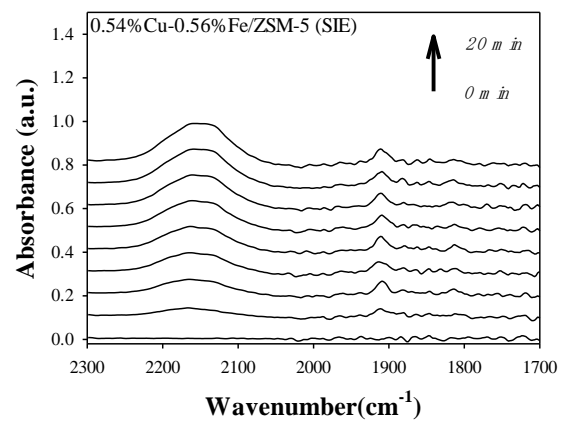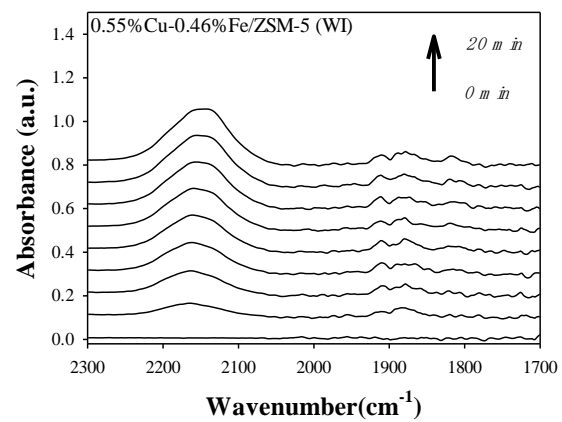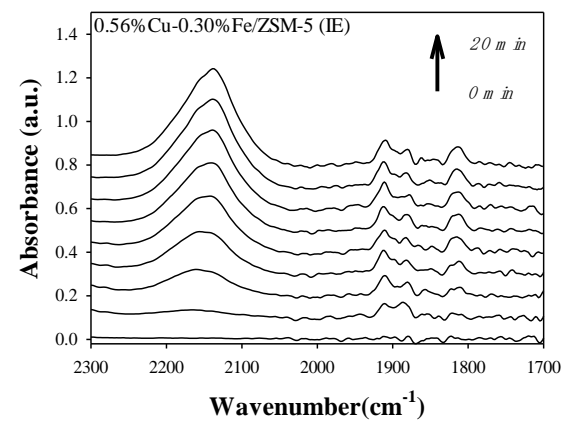



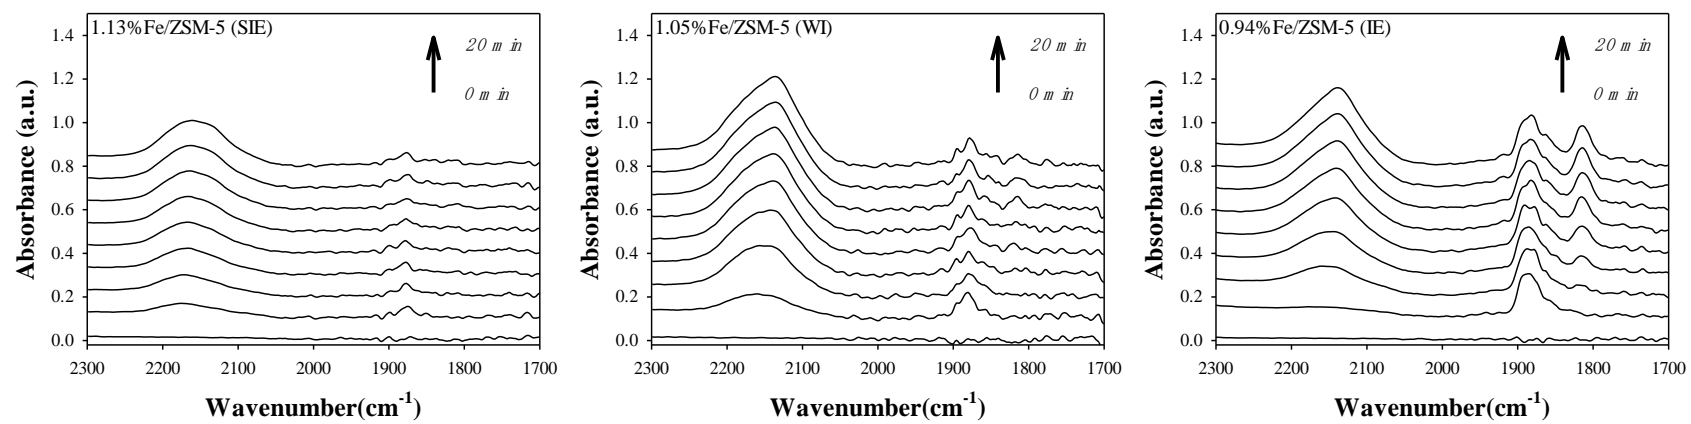

**Figure S5.** NO-FTIR spectra for the catalysts prepared with different methods from 0 to 20 min.

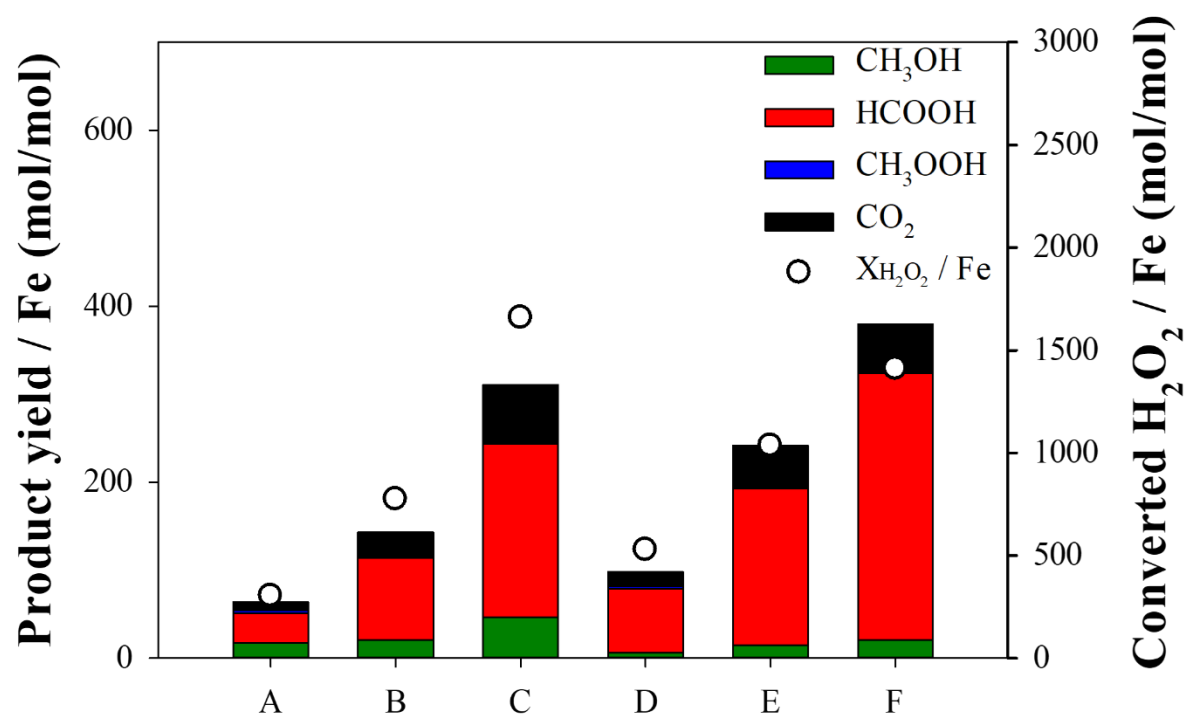

**Figure S6.** Partial oxidation of methane over 0.54%Cu-0.56%Fe/ZSM-5(SIE) (A), 0.55%Cu-0.46%Fe/ZSM-5(WI) (B), 0.56%Cu-0.30%Fe/ZSM-5(IE) (C), 0.65%Fe/ZSM-5(SIE) (D), 0.54%Fe/ZSM-5(WI) (E), and 0.51%Fe/ZSM-5(IE) (F). Reaction conditions: 50 mg catalyst, 31 bar methane, 0.277 M H<sub>2</sub>O<sub>2</sub>, liquid volume = 30 mL, reaction temperature = 50 °C.

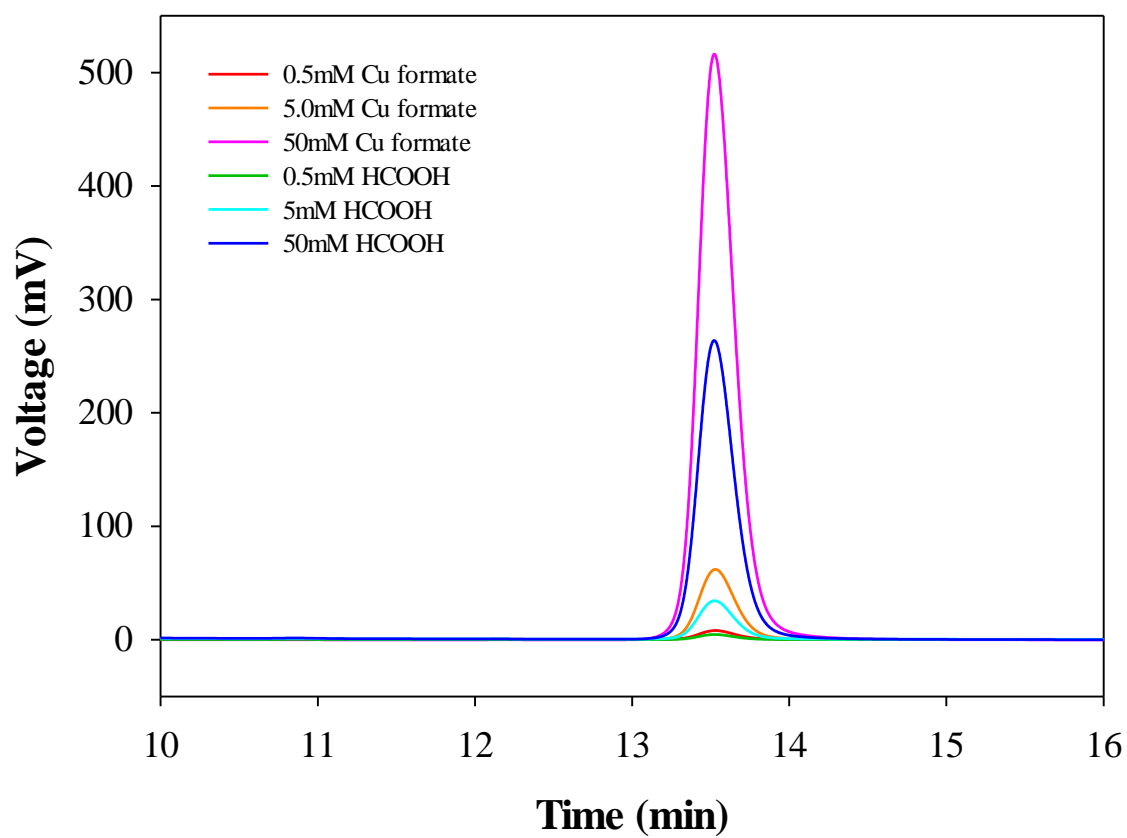

**Figure S7.** HPLC chromatograms for the standard solutions of different HCOOH and Cu(HCOO)<sub>2</sub> concentrations.



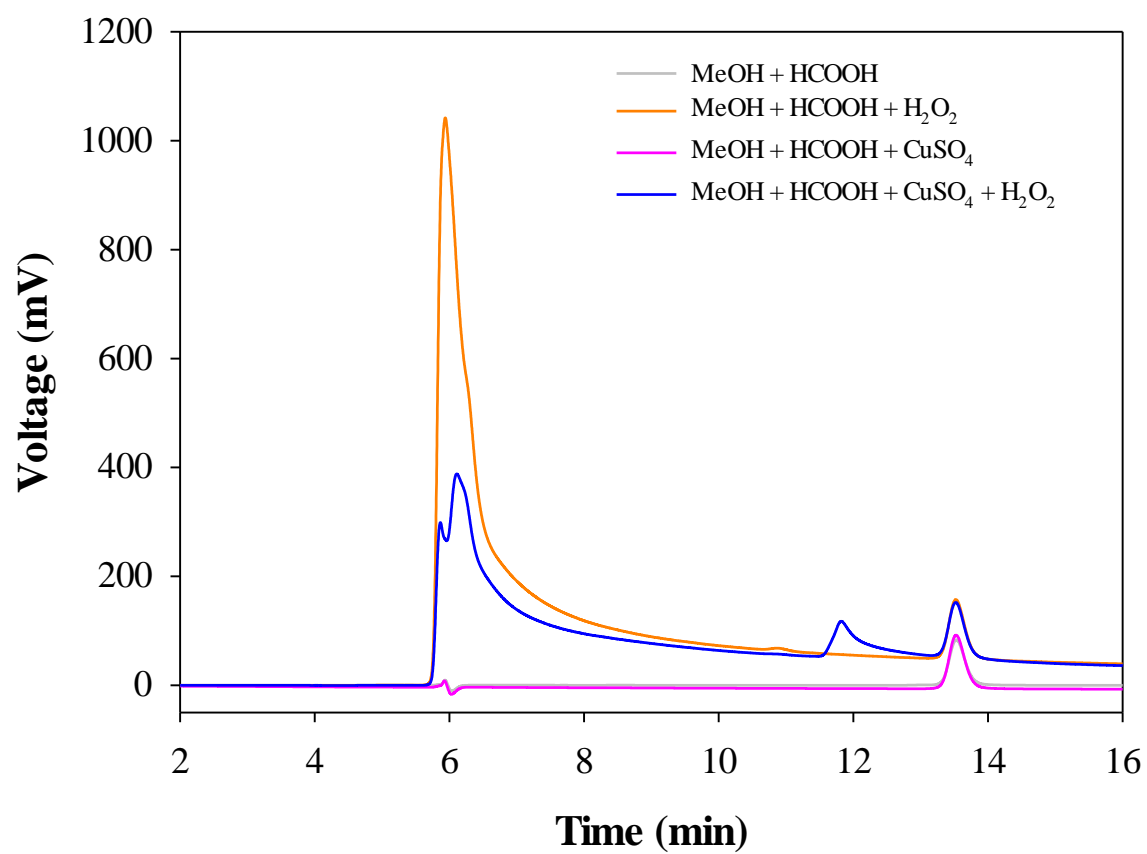

**Figure S8.** HPLC chromatograms for the standard solutions with different compositions.

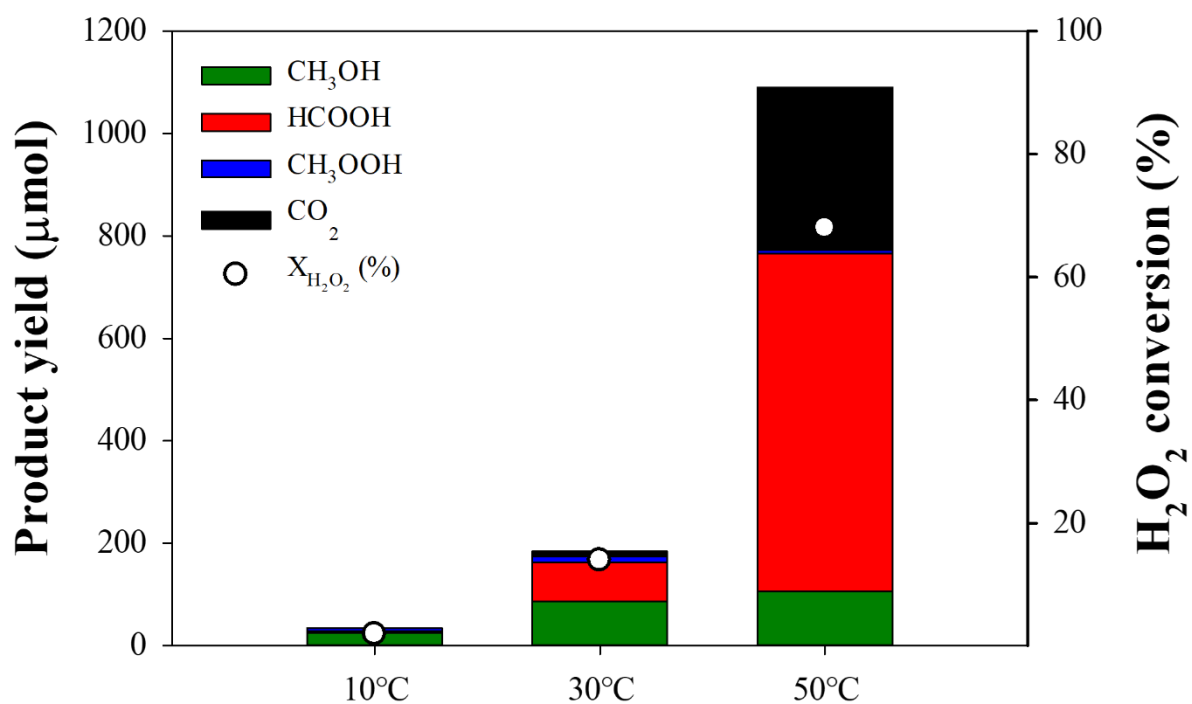

**Figure S9.** Partial oxidation of methane over Cu-Fe/ZSM-5(IE) catalyst at different temperatures. Reaction conditions: 50 mg catalyst, 31 bar methane, 0.277 M H<sub>2</sub>O<sub>2</sub>, liquid volume = 30 mL.

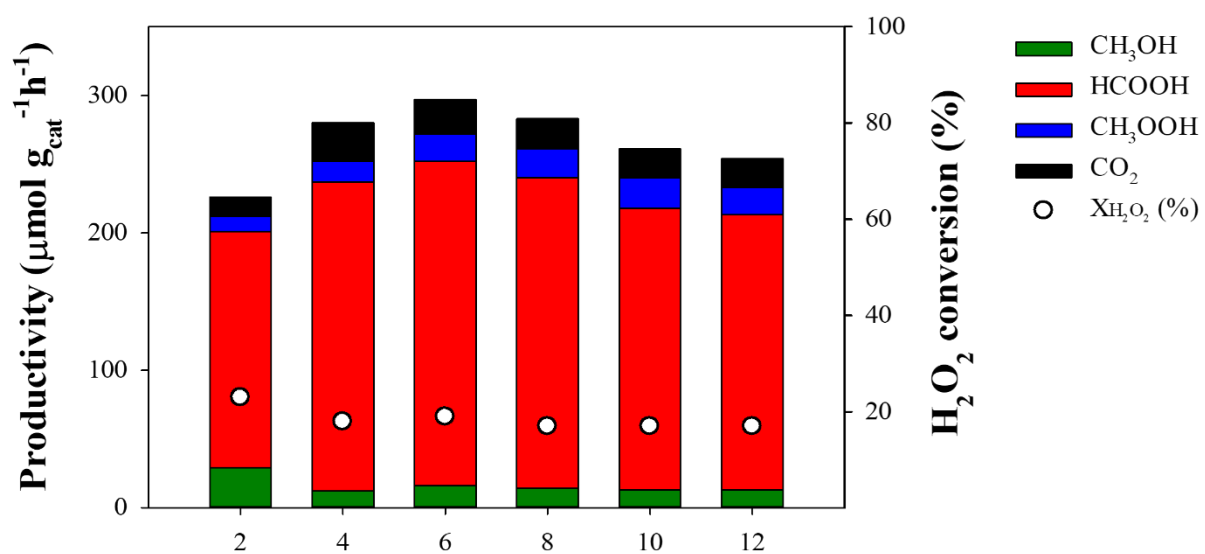

**Figure S10.** Continuous aqueous phase oxidation of methane with  $\text{H}_2\text{O}_2$  in a flow reactor over H-ZSM-5. Reaction conditions:  $P_{\text{CH}_4}$  = 21 bar,  $F_{\text{CH}_4}$  = 50 mL/min,  $[\text{H}_2\text{O}_2]$  = 0.123 mol/L,  $F_{\text{H}_2\text{O}_2}$  = 0.25 mL/min,  $W_{\text{cat}}$  = 0.2g, Temperature = 50 °C.



**Table S1.** The fraction of each Fe species estimated from the UV-vis band in Fig. S4 for Fe/ZSM-5 and Cu-Fe/ZSM-5 catalysts.

| Catalyst                   | Fraction of UV-Vis band (%) |            |            |         |
|----------------------------|-----------------------------|------------|------------|---------|
|                            | 200~250 nm                  | 250~350 nm | 350~450 nm | >450 nm |
| 0.54%Cu-0.56%Fe/ZSM-5(SIE) | 20                          | 28         | 20         | 32      |
| 1.13%Fe/ZSM-5(SIE)         | 20                          | 32         | 22         | 27      |
| 0.55%Cu-0.46%Fe/ZSM-5(WI)  | 27                          | 42         | 18         | 13      |
| 1.05%Fe/ZSM-5(WI)          | 23                          | 40         | 23         | 14      |
| 0.56%Cu-0.30%Fe/ZSM-5(IE)  | 33                          | 43         | 13         | 11      |
| 0.94%Fe/ZSM-5(IE)          | 34                          | 55         | 9          | 3       |

**Table S2.** Catalytic activity result of partial oxidation of methane in this study at 50 °C.<sup>a</sup>

| Entry | Catalyst                             | Cu (mM) | $X_{\text{H}_2\text{O}_2}$ (%) | Product (mmol)     |       |                     |                 |       |
|-------|--------------------------------------|---------|--------------------------------|--------------------|-------|---------------------|-----------------|-------|
|       |                                      |         |                                | CH <sub>3</sub> OH | HCOOH | CH <sub>3</sub> OOH | CO <sub>2</sub> | Total |
| 1     | CuO                                  | 3.93    | 99                             | 0.000              | 0.013 | 0.000               | 0.000           | 0.013 |
| 2     | Cu <sub>2</sub> O                    | 3.93    | 89                             | 0.002              | 0.024 | 0.012               | 0.019           | 0.057 |
| 3     | Cu(CH <sub>3</sub> COO) <sub>2</sub> | 4.41    | 99                             | 0.004              | 0.040 | 0.000               | 0.030           | 0.074 |
| 4     | Cu(NO <sub>3</sub> ) <sub>2</sub>    | 4.41    | 29                             | 0.004              | 0.059 | 0.038               | 0.023           | 0.124 |
| 5     | CuSO <sub>4</sub>                    | 4.41    | 30                             | 0.009              | 0.084 | 0.028               | 0.028           | 0.149 |
| 6     | CuSO <sub>4</sub>                    | 0.147   | 15                             | 0.017              | 0.010 | 0.017               | 0.000           | 0.044 |

<sup>a</sup>Recation condition: 30 mL of 0.277 M H<sub>2</sub>O<sub>2</sub>, 95 mL of CH<sub>4</sub> at 31 bar, 50 mg of catalyst, reaction time = 1 h.

**Table S3.** The Cu concentration in the product solution,  $^1\text{H}$ -NMR spectra, and concentrations of HCOOH determined with  $^1\text{H}$ -NMR and HPLC during the cyclic test.<sup>a</sup>

| The number of experiment for the cyclic test | 1                                                                                  | 2    | 3    |
|----------------------------------------------|------------------------------------------------------------------------------------|------|------|
| Cu concentration <sup>b</sup> (ppm)          | 5.20                                                                               | 1.89 | 0.8  |
| $^1\text{H}$ -NMR spectra                    | 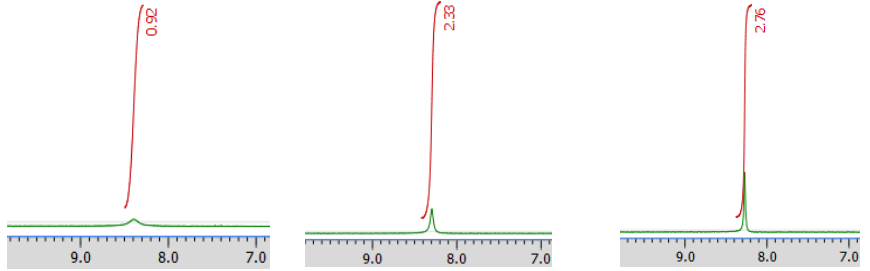 |      |      |
| HCOOH concentration <sup>c</sup> (mM)        | 7.6                                                                                | 14.9 | 17.1 |
| HCOOH concentration <sup>d</sup> (mM)        | 22                                                                                 | 16.5 | 18   |

<sup>a</sup>0.56%Cu-0.30%Fe/ZSM-5(IE) catalyst was used and the other reaction conditions are same with those in Fig. 5.

<sup>b</sup>Cu concentration was determined with ICP – OES.

<sup>c</sup>HCOOH concentration was determined with  $^1\text{H}$ -NMR.

<sup>d</sup>HCOOH concentration was determined with HPLC.



**Table S4.** Concentrations of HCOOH in different stand solutions determined with  $^1\text{H}$ -NMR and HPLC.

| Entry | Standard solution                                                                          | Concentration of<br>HCOOH determined<br>with $^1\text{H}$ -NMR<br>(M) | Concentration of<br>HCOOH<br>determined with<br>HPLC<br>(M) |
|-------|--------------------------------------------------------------------------------------------|-----------------------------------------------------------------------|-------------------------------------------------------------|
| 1     | 0.02 M HCOOH + 0.0015 M MeOH                                                               | 0.02                                                                  | 0.02                                                        |
| 2     | 0.02 M HCOOH + 0.0015 M MeOH + 0.277 M<br>$\text{H}_2\text{O}_2$                           | 0.02                                                                  | 0.02                                                        |
| 3     | 0.02 M HCOOH + 0.0015 M MeOH + 0.26 mM<br>$\text{CuSO}_4$                                  | 0.003                                                                 | 0.02                                                        |
| 4     | 0.02 M HCOOH + 0.0015 M MeOH + 0.26 mM<br>$\text{CuSO}_4$ + 0.277 M $\text{H}_2\text{O}_2$ | 0.003                                                                 | 0.02                                                        |

**Table S5.** The amount of Cu leached from Cu/ZSM-5 with different concentrations of HCOOH.

| Entry | Condition                               | The percentage of Cu leached (%) |
|-------|-----------------------------------------|----------------------------------|
| 1     | HCOOH 0.5 mmol<br>+ 1.20% Cu/ZSM-5 (IE) | 40                               |
| 2     | HCOOH 1 mmol<br>+ 1.20% Cu/ZSM-5 (IE)   | 49                               |
| 3     | HCOOH 2 mmol<br>+ 1.20% Cu/ZSM-5 (IE)   | 55                               |

Reaction conditions: 30 mL of 0.277 M H<sub>2</sub>O<sub>2</sub>, 95 mL of N<sub>2</sub> at 31 bar, 50 mg of catalyst, reaction temperature = 50 °C , reaction time = 1 h.

**Table S6.** The activity comparison among catalysts reported previously and in this work during continuous liquid-phase selective oxidation of methane in a flow reactor.

| Entry | Catalyst                               | H <sub>2</sub> O <sub>2</sub><br>Conversion (%) | Selectivity (%)    |       |                     |                 | Total Productivity<br>(mol kg <sub>cat</sub> <sup>-1</sup> h <sup>-1</sup> ) | Reference  |
|-------|----------------------------------------|-------------------------------------------------|--------------------|-------|---------------------|-----------------|------------------------------------------------------------------------------|------------|
|       |                                        |                                                 | CH <sub>3</sub> OH | HCOOH | CH <sub>3</sub> OOH | CO <sub>2</sub> |                                                                              |            |
| 1     | H-ZSM-5 <sup>a</sup>                   | 64.1                                            | 8.7                | 81.6  | 1.6                 | 8.1             | 0.081                                                                        | [65]       |
| 2     | 1.5%Cu/ZSM-5 <sup>a</sup>              | 52.8                                            | 89.1               | 0.0   | 1.0                 | 9.9             | 0.065                                                                        | [65]       |
| 3     | 1.5%Fe/ZSM-5 <sup>a</sup>              | 93.3                                            | 15.1               | 71.4  | 0.0                 | 13.6            | 0.032                                                                        | [65]       |
| 4     | 0.4%Fe-0.4%Cu/ZSM-5 <sup>a</sup>       | 82.9                                            | 39.2               | 56.2  | 0.8                 | 3.8             | 0.049                                                                        | [65]       |
| 5     | 1.5%Fe-1.5%Cu/ZSM-5 <sup>a</sup>       | 92.9                                            | 92.2               | 0.0   | 0.0                 | 7.8             | 0.081                                                                        | [65]       |
| 6     | H-ZSM-5 <sup>b</sup>                   | 19                                              | 7                  | 78    | 7                   | 8               | 0.267                                                                        | This study |
| 7     | 0.51%Fe/ZSM-5(IE) <sup>b</sup>         | 90                                              | 5                  | 78    | 1                   | 16              | 1.125                                                                        | This study |
| 8     | 0.56%Cu-0.30%Fe/ZSM-5(IE) <sup>b</sup> | 65                                              | 17                 | 66    | 1                   | 16              | 0.933                                                                        | This study |

<sup>a</sup>Reaction conditions: P<sub>CH<sub>4</sub></sub> = 21 bar, F<sub>CH<sub>4</sub></sub> = 10 mL/min, [H<sub>2</sub>O<sub>2</sub>] = 0.123 mol/L, F<sub>H<sub>2</sub>O<sub>2</sub></sub> = 0.25 mL/min, W<sub>cat.</sub> = 1.5g, Temperature = 50 °C.<sup>b</sup>Reaction conditions: P<sub>CH<sub>4</sub></sub> = 21 bar, F<sub>CH<sub>4</sub></sub> = 50 mL/min, [H<sub>2</sub>O<sub>2</sub>] = 0.123 mol/L, F<sub>H<sub>2</sub>O<sub>2</sub></sub> = 0.25 mL/min, W<sub>cat.</sub> = 0.2g, Temperature = 50 °C.

**Table S7.** The concentration of Cu species in the product solution during continuous liquid-phase selective oxidation of methane over 0.56%Cu-0.30%Fe/ZSM-5(IE) in a flow reactor.

| Time on stream (h) | Liquid volume collected (mL) | Concentration of Cu in the solution (ppm) | The percentage of Cu leached in the total amount of Cu in the fresh catalyst (%) |
|--------------------|------------------------------|-------------------------------------------|----------------------------------------------------------------------------------|
| 2                  | 27                           | 5.44                                      | 15                                                                               |
| 4                  | 26.5                         | 3.84                                      | 10                                                                               |
| 6                  | 29                           | 2.94                                      | 8                                                                                |
| 8                  | 27                           | 1.75                                      | 5                                                                                |
| 10                 | 27                           | 1.25                                      | 3                                                                                |
| 12                 | 27                           | 1.73                                      | 5                                                                                |
| 14                 | 25                           | 1.71                                      | 5                                                                                |

Reaction conditions:  $P_{\text{CH}_4} = 21$  bar,  $F_{\text{CH}_4} = 50$  mL/min,  $[\text{H}_2\text{O}_2] = 0.123$  mol/L,  $F_{\text{H}_2\text{O}_2} = 0.25$  mL/min,  $W_{\text{cat.}} = 0.2$ g, Temperature = 50 °C.
